# Supplementary material
Source: publisher figshare collection journal article supplement (https://geolsoc.figshare.com/ndownloader/files/24681289)
Supplement: Supplementary file 1 [file 24681289]

## Sheet: Appendix 1
Appendix 1: Measured oxygen and hydrogen isotopes of precipitation for this study, averaged in triplicate and reported to one decimal
Sample	Average of δ18O (‰)	Average of δ2H (‰)
1	-26.6006	-193.356
2	-33.3391	-253.343
3	-24.1973	-176.889
4	-16.543	-106.612
5	-14.2822	-79.3231
6	-15.3022	-107.227
7	-11.0687	-78.2636
8	-13.0255	-93.49
9	-20.9333	-151.027
10	-27.3484	-200.801
11	-17.4172	-124.11
12	-20.6867	-141.39
13	-15.2135	-87.4243
14	-18.6162	-122.831
15	-12.418	-82.5174
16	-6.96577	-37.1627
17	-19.4117	-141.589
18	-14.8339	-101.589
19	-16.5038	-111.144
20	-21.2317	-149.683
21	-14.1042	-81.6025
22	-23.2234	-163.07
23	-17.2158	-113.119
24	-18.9755	-127.858
25	-20.8965	-144.256
26	-18.4527	-123.278
27	-17.8982	-116.762
28	-29.9455	-222.681
29	-11.158	-70.6087
30	-18.1095	-111.782
31	-13.7374	-80.0004
32	-22.1778	-147.358
33	-20.9584	-137.883
34	-19.5101	-131.276
35	-15.6945	-102.034
36	-15.2093	-91.1453
37	-17.8837	-104.323
38	-15.0444	-91.8092
39	-32.1904	-243.411
40	-24.5168	-169.759
41	-23.9734	-166.851
42	-20.344	-138
43	-18.4438	-110.791
44	-19.5285	-125.602
45	-20.445	-141.885
46	-16.8842	-113.871
47	-15.4012	-101.759
48	-18.047	-111.751
49	-16.169	-109.978
50	-15.609	-106.951
51	-17.5194	-124.731
52	-21.7838	-161.443
53	-29.9015	-223.005
54	-21.3255	-151.77
55	-21.7119	-156.028
56	-15.3298	-111.653
57	-22.4582	-166.443
58	-18.0076	-132.761
59	-16.0127	-115.191
60	-23.0484	-154.329
61	-17.4831	-121.898
62	-9.21938	-56.6806
63	-12.1088	-75.9059
64	-8.47038	-56.4491
65	-10.4422	-79.2688
66	-6.90896	-42.7735
67	-16.9727	-121.922
68	-7.59558	-56.2027
69	-7.43028	-46.3896
70	-6.12274	-34.4635
71	-18.8974	-137.197
72	-20.8572	-152.09
73	-5.07161	-32.742
74	-8.75478	-59.8825
75	-3.03053	-13.9341
76	-13.9463	-96.6726
77	-14.083	-100.122
78	-16.5979	-120.277
79	-8.58312	-62.7562
80	-8.35317	-61.7438
81	-11.7905	-84.4642
82	-5.63398	-34.649
83	-10.2723	-73.1845
84	-8.14405	-57.1028
85	-9.60008	-68.6059
86	-8.1543	-56.5076
87	-9.91587	-69.8732
88	-9.77705	-69.0013
89	-13.8125	-114.082
90	-7.56474	-50.3332
91	-11.8156	-81.4632
93	-11.3073	-81.4935
94	-11.6089	-81.1762
95	-10.2144	-72.9753
96	-12.3695	-91.6551
97	-12.8223	-94.9375
98	-12.1921	-85.5652
99	-11.2553	-78.6309
100	-10.752	-75.3854
101	-8.36495	-55.5416
102	-5.22455	-29.2535
103	-8.31371	-55.3418
104	-7.27685	-47.2058
105	-7.14909	-45.0308
106	-3.56433	-15.5616
107	-9.80791	-70.1403
108	-0.039583	14.9186
109	-4.89356	-19.4582
110	-4.98693	-29.133
111	-3.63347	-24.0036
112	-13.8072	-93.9574
113	-6.90409	-47.5879
114	-13.0003	-80.3908
115	-10.1617	-61.2588
116	-11.698	-70.6455
118	-14.4039	-100.899
119	-9.86534	-68.0038
120	-7.33042	-46.66
121	-20.6461	-150.661
122	-18.0577	-134.171
123	-17.0088	-122.907
124	-13.4291	-91.2691
125	-14.4848	-99.4688
126	-14.848	-105.958
127	-29.1489	-215.099
128	-5.8402	-39.5615
129	-6.55823	-39.6802
130	-13.3444	-85.0233
131	-17.6027	-111.133
132	-17.0105	-123.385
133	-18.9853	-137.2
134	-19.358	-139.356
